# Supplementary material for: Eliciting Specific Electrochemical Reaction Behavior by Rational Design of a Red Phosphorus Electrode for Sodium-Ion Batteries
Source: MDPI journal article supplement (doi:10.3390/nano11113053), 2021-11-13
Supplement: s1 [file s1]

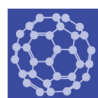

## Article

# Rational Design for Electrochemical Analysis of a Red Phosphorus Electrode for Sodium-ion Batteries

Jong Hyuk Yun, San Moon, Do Kyung Kim\* and Joo-Hyung Kim\*

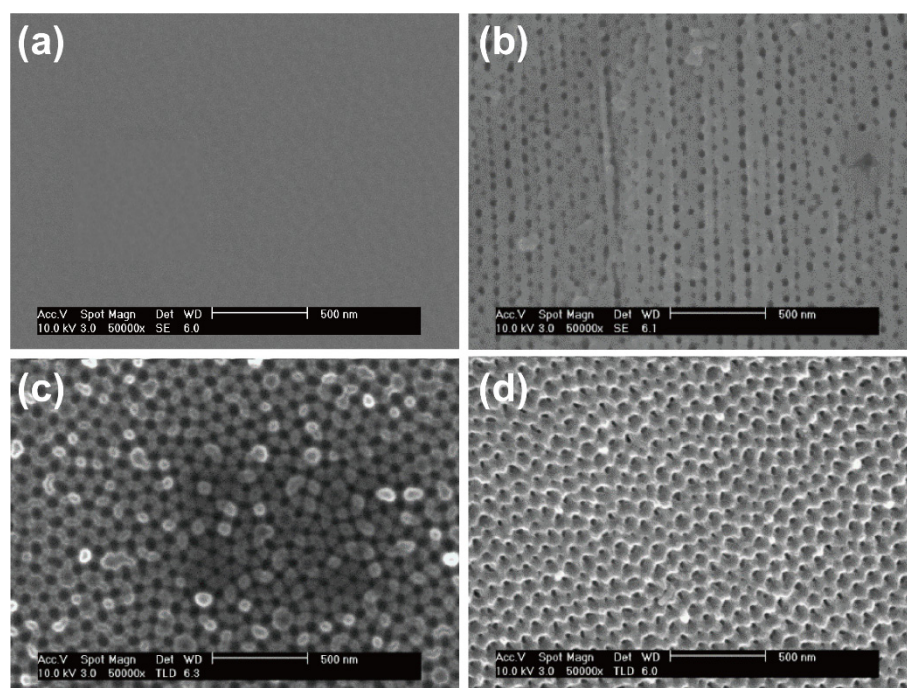

**Figure S1.** Procedure for fabrication of the red P@C NW electrode: (a) Electropolishing of the aluminum surface; (b) Preparation of porous alumina templates by the first-step anodization process; (c) Alumina etching process; (d) Preparation of porous alumina templates by a second-step anodization process.
